# Supplementary material for: Stabilization of two conformers via intra- or inter-molecular hydrogen bonds in a dinuclear vanadium(v) complex with a pendant Schiff base: theoretical insight
Source: Royal Society of Chemistry journal article supplement (doi:10.1039/c9ra07006k), 2019-01-01
Supplement: c9ra07006k1.pdf [file c9ra07006k1.pdf]

## Electronic Supplementary Information

### **Stabilization of two conformers via intra- or inter-molecular hydrogen bonds in a dinuclear vanadium(V) complex with a pendant Schiff base: A theoretical insight**

Snehasish Thakur<sup>a</sup>, Michael G. B. Drew<sup>b</sup>, Antonio Franconetti<sup>c</sup>, Antonio Frontera<sup>c</sup> and Shouvik  
Chattopadhyay<sup>a,\*</sup>

<sup>a</sup>*Department of Chemistry, Inorganic Section, Jadavpur University, Kolkata 700 032, India, E-mail: [shouvik.chem@gmail.com](mailto:shouvik.chem@gmail.com)*

<sup>b</sup>*School of Chemistry, The University of Reading, P.O. Box 224, Whiteknights, Reading RG6 6AD, United Kingdom*

<sup>c</sup>*Departament de Química, Universitat de les Illes Balears, Crta. De Valldemossa km 7.5, 07122 Palma (Balears), Spain.*

---

#### **Contents:**

- (1) Selected bond angles (°) for the complex  $(\mu\text{-O})_2[\text{V}(\text{O})(\text{L})]_2$  (Table S1).
- (2) Crystal data and refinement details of the complex  $(\mu\text{-O})_2[\text{V}(\text{O})(\text{L}^1)]_2$  (Table S2).
- (3) Selected bond lengths (Å) for the complex  $(\mu\text{-O})_2[\text{V}(\text{O})(\text{L}^1)]_2$  (Table S3).
- (4) Selected bond angles (°) for the complex  $(\mu\text{-O})_2[\text{V}(\text{O})(\text{L}^1)]_2$  (Table S4).
- (5) FT-IR spectrum of the complex (Fig. S1).
- (6) UV-Vis spectrum of the complex in CH<sub>3</sub>CN medium (Fig. S2).

(7)  $^1\text{H}$  NMR spectrum of the complex in DMSO- $d_6$  medium (**Fig. S3**).

(8)  $^{13}\text{C}$  NMR spectrum of the complex in DMSO- $d_6$  medium (**Fig. S4**).

**Table S1:** Selected bond angles ( $^\circ$ ) for the complex  $(\mu\text{-O})_2[\text{V}(\text{O})(\text{L})]_2$ .

|                               |            |
|-------------------------------|------------|
| O(1)-V(1)-O(2)                | 106.41(11) |
| O(1)-V(1)-O(11)               | 97.56(10)  |
| O(1)-V(1)-N(19)               | 159.43(11) |
| O(1)-V(1)-N(22)               | 93.24(10)  |
| O(2)-V(1)-O(11)               | 103.26(10) |
| O(2)-V(1)-N(19)               | 92.85(11)  |
| O(2)-V(1)-N(22)               | 94.32(11)  |
| O(11)-V(1)-N(19)              | 84.66(10)  |
| O(11)-V(1)-N(22)              | 155.76(10) |
| N(19)-V(1)-N(22)              | 77.84(10)  |
| O(1)-V(1)-O(1 <sup>a</sup> )  | 79.15(9)   |
| O(1 <sup>a</sup> )-V(1)-O(2)  | 170.86(10) |
| O(1 <sup>a</sup> )-V(1)-O(11) | 82.86(8)   |
| O(1 <sup>a</sup> )-V(1)-N(19) | 80.86(9)   |
| O(1 <sup>a</sup> )-V(1)-N(22) | 77.94(9)   |
| O(3 <sup>b</sup> )-V(2)-N(42) | 80.42(9)   |
| O(3)-V(2)-O(4)                | 107.51(11) |
| O(3)-V(2)-O(31)               | 97.73(10)  |
| O(3)-V(2)-N(39)               | 154.42(10) |

|                               |            |
|-------------------------------|------------|
| O(3)-V(2)-N(42)               | 93.80(10)  |
| O(3)-V(2)-O(3 <sup>b</sup> )  | 78.58(9)   |
| O(4)-V(2)-O(31)               | 101.68(10) |
| O(4)-V(2)-N(39)               | 97.21(11)  |
| O(4)-V(2)-N(42)               | 92.65(11)  |
| O(3 <sup>b</sup> )-V(2)-O(4)  | 171.19(9)  |
| O(31)-V(2)-N(39)              | 83.29(10)  |
| O(31)-V(2)-N(42)              | 157.92(10) |
| O(3 <sup>b</sup> )-V(2)-O(31) | 83.48(8)   |
| N(39)-V(2)-N(42)              | 78.27(10)  |
| O(3 <sup>b</sup> )-V(2)-N(39) | 76.14(9)   |

**Table S2:** Crystal data and refinement details of the complex  $(\mu\text{-O})_2[\text{V}(\text{O})(\text{L}^1)]_2$ .

|                |                                                                          |
|----------------|--------------------------------------------------------------------------|
| Formula        | $\text{C}_{24}\text{H}_{32}\text{Br}_2\text{N}_4\text{O}_{10}\text{V}_2$ |
| Formula Weight | 798.22                                                                   |
| Temperature(K) | 273                                                                      |
| Crystal system | Orthorhombic                                                             |
| Space group    | <i>Pbca</i>                                                              |
| a(Å)           | 10.0908(9)                                                               |
| b(Å)           | 13.7330(10)                                                              |
| c(Å)           | 21.1628(15)                                                              |
| V              | 2932.7(4)                                                                |
| Z              | 4                                                                        |

|                                     |                |
|-------------------------------------|----------------|
| $d_{\text{calc}}(\text{g cm}^{-3})$ | 1.808          |
| $\mu(\text{mm}^{-1})$               | 3.423          |
| $F(000)$                            | 1600           |
| Total Reflections                   | 22350          |
| Unique Reflections                  | 3030           |
| Observed data [ $I > 2 \sigma(I)$ ] | 2504           |
| No. of parameters                   | 198            |
| R(int)                              | 0.051          |
| R1, wR2 (all data)                  | 0.0466, 0.0987 |
| R1, wR2 [ $I > 2 \sigma(I)$ ]       | 0.0356, 0.0927 |

**Table S3:** Selected bond lengths (Å) for the complex  $(\mu\text{-O})_2[\text{V}(\text{O})(\text{L}^1)]_2$

| Bond lengths (Å)        |          |
|-------------------------|----------|
| V(1)-O(1)               | 1.667(2) |
| V(1)-O(2)               | 1.621(2) |
| V(1)-O(11)              | 1.909(2) |
| V(1)-N(19)              | 2.151(3) |
| V(1)-N(22)              | 2.164(3) |
| V(1)-O(1 <sup>c</sup> ) | 2.317(2) |

Symmetry transformation; <sup>c</sup>= 1-x, 1-y, 1-z.

**Table S4:** Selected bond angles (°) for the complex  $(\mu\text{-O})_2[\text{V}(\text{O})(\text{L}^1)]_2$ .

|                  |            |
|------------------|------------|
| O(1)-V(1)-O(2)   | 107.35(11) |
| O(1)-V(1)-O(11)  | 99.30(10)  |
| O(1)-V(1)-N(19)  | 156.24(10) |
| O(1)-V(1)-N(22)  | 93.12(10)  |
| O(2)-V(1)-O(11)  | 102.46(10) |
| O(2)-V(1)-N(19)  | 94.67(11)  |
| O(2)-V(1)-N(22)  | 91.08(11)  |
| O(11)-V(1)-N(19) | 84.13(10)  |
| O(11)-V(1)-N(22) | 157.86(10) |
| N(19)-V(1)-N(22) | 77.31(10)  |
| O(1)-V(1)-O(1°)  | 79.27(9)   |
| O(1°)-V(1)-O(2)  | 168.52(10) |
| O(1°)-V(1)-O(11) | 85.34(8)   |
| O(1°)-V(1)-N(19) | 77.59(9)   |
| O(1°)-V(1)-N(22) | 79.03(9)   |

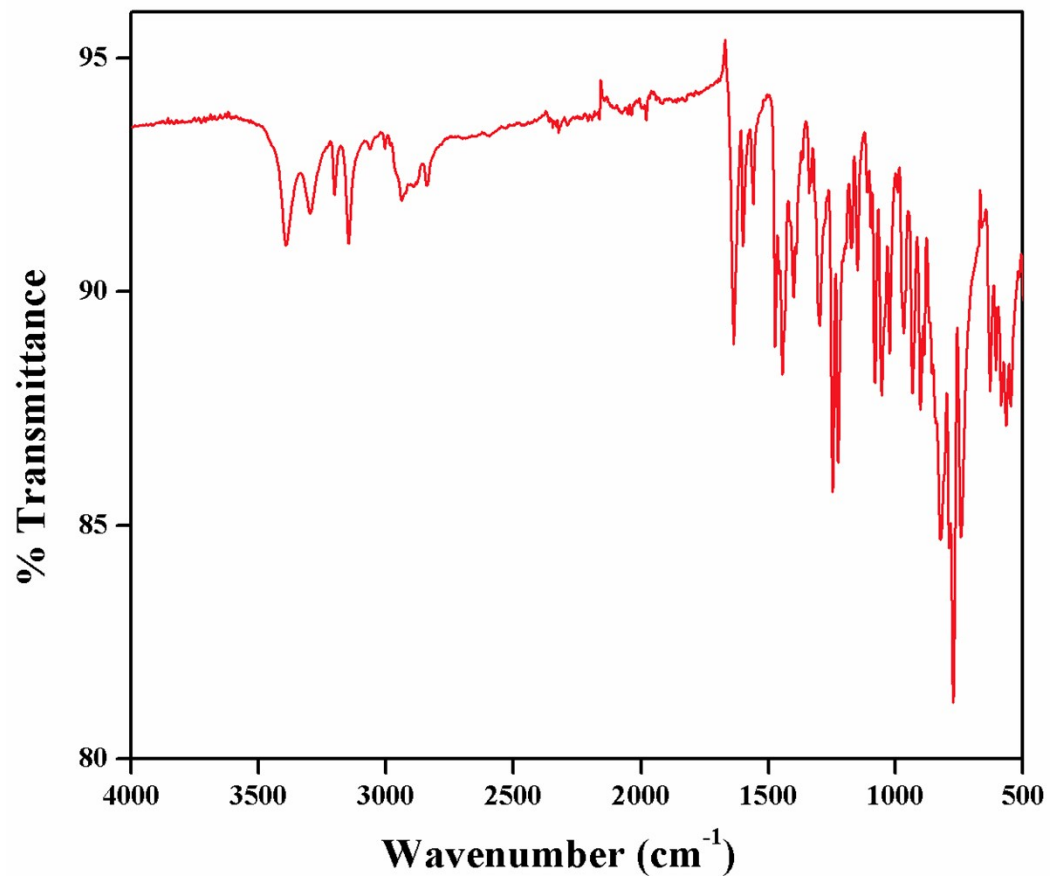

**Fig. S1:** FT-IR spectrum of the complex.

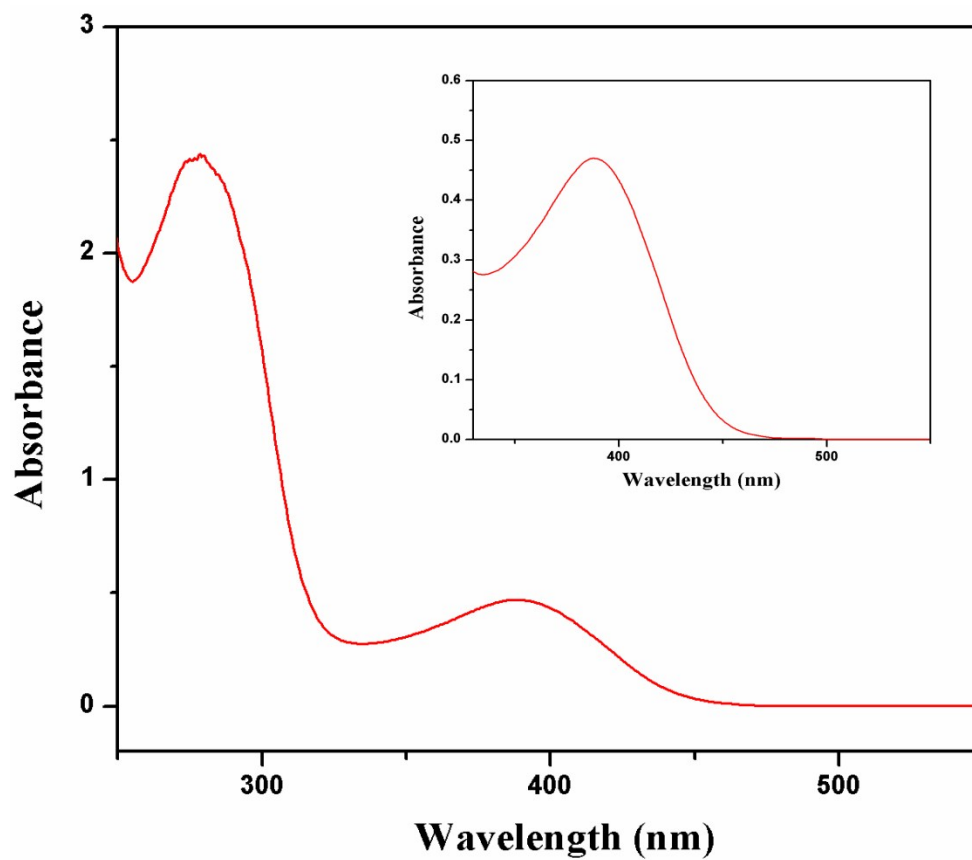

**Fig. S2:** UV-Vis spectrum of the complex in  $\text{CH}_3\text{CN}$  medium. Inset shows the peak around 390 nm, indicative of LMCT transition.

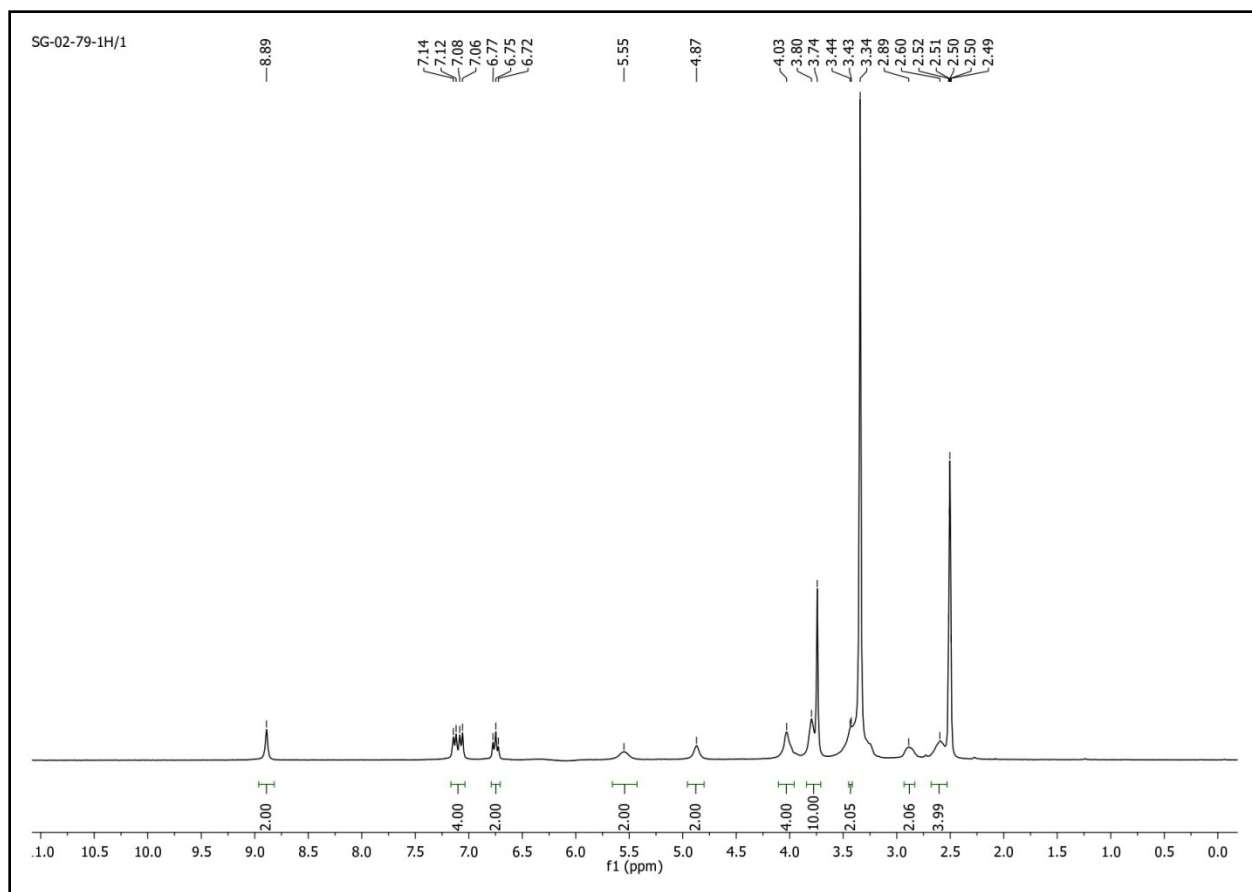

**Fig. S3:**  $^1\text{H}$  NMR spectrum of the complex in  $\text{DMSO-d}_6$  medium.



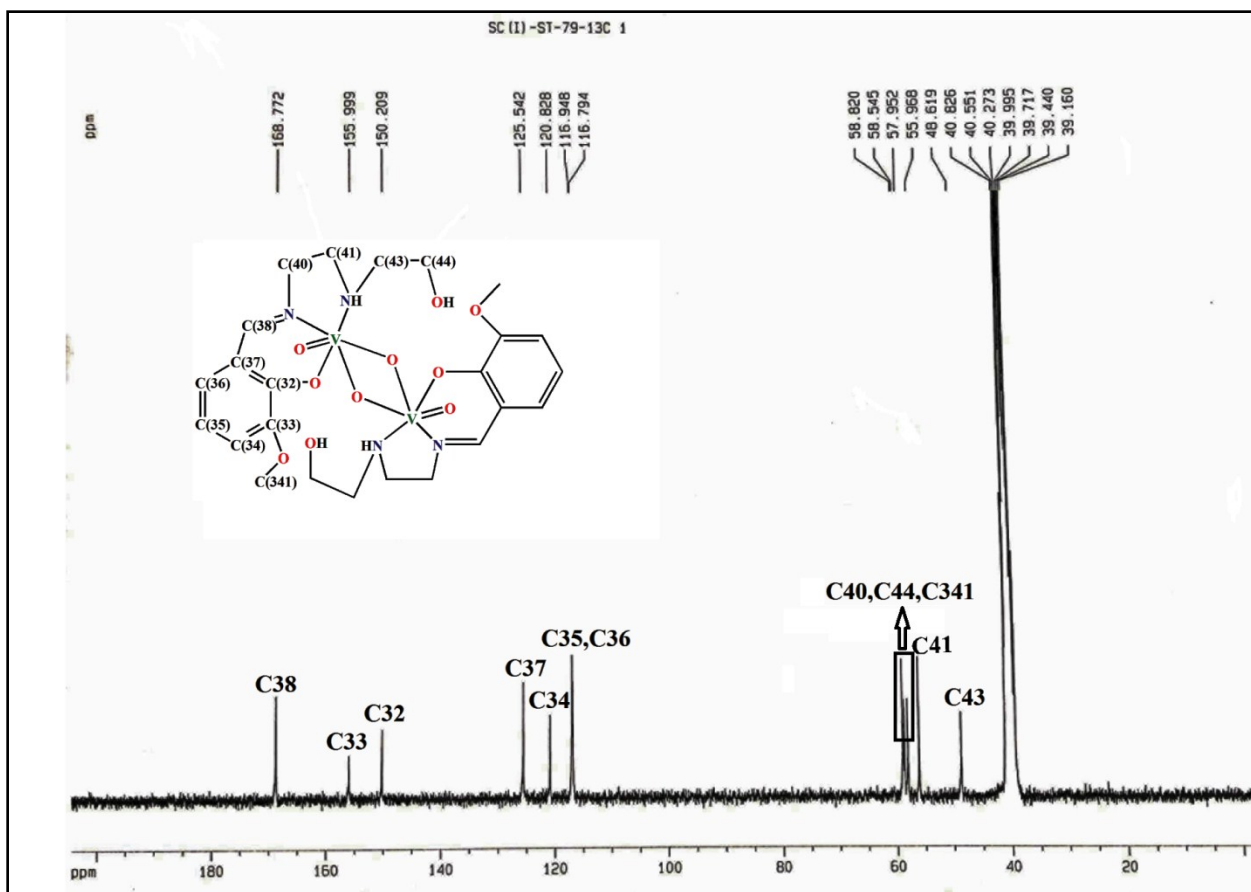

**Fig. S4:**  $^{13}\text{C}$  NMR spectrum of the complex in  $\text{DMSO-d}_6$  medium.
